# Supplementary material for: Synthesis of Calamitic Fluorinated Mesogens with Complex Crystallization Behaviour
Source: Preprints.org preprint supplement (doi:10.20944/preprints202311.0351.v1), 2023-11-06
Supplement: Supplementary file 1 [file supplementary]

**Supplementary Information.**

**Synthesis of Calamitic Fluorinated Mesogens with Complex Crystallization Behaviour**

**Anokhin D.V.*1,2, Maryasevskaya A.V.1, Abukaev A.F.1, Ozkose, U.U. 3,4, Buglakov A.I. 1, Ivanov D.A.1,2,5, Ameduri B. M.*1,3**

| **Citation:** To be added by editorial staff during production.  Academic Editor: Firstname Lastname  Received: date  Revised: date  Accepted: date  Published: date  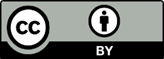  **Copyright:** © 2023 by the authors. Submitted for possible open access publication under the terms and conditions of the Creative Commons Attribution (CC BY) license (https://creativecommons.org/licenses/by/4.0/). |
| --- |

1. Lomonosov Moscow State University, Faculty of Chemistry, Russia,119991, Moscow 1, GSP-1, 1-3 Leninskiye Gory, Russian Federation
2. Scientific Center for Genetics and Life Sciences, Sirius University of Science and Technology, 1 Olympic Ave., 354340 Sochi, Russian Federation
3. Institut Charles Gerhardt, CNRS, University of Montpellier, Ecole Nationale Supérieure de Chimie de Montpellier, ENSCM, 34000 Montpellier, France
4. Department of Chemistry, Faculty of Science and Letters, Piri Reis University, Tuzla, 34940 Istanbul, Turkey

5 Institut de Sciences des Matériaux de Mulhouse-IS2M, CNRS UMR 7361, Jean Starcky 15, F-68057 Mulhouse, France

***** Correspondence: Tel.: [+33(0)4-48-79-2020](callto:+33(0)4-48-79-2020)

Bruno.ameduri@enscm.fr; [deniano@yahoo.com](mailto:dimitri.ivanov.2014@gmail.com)


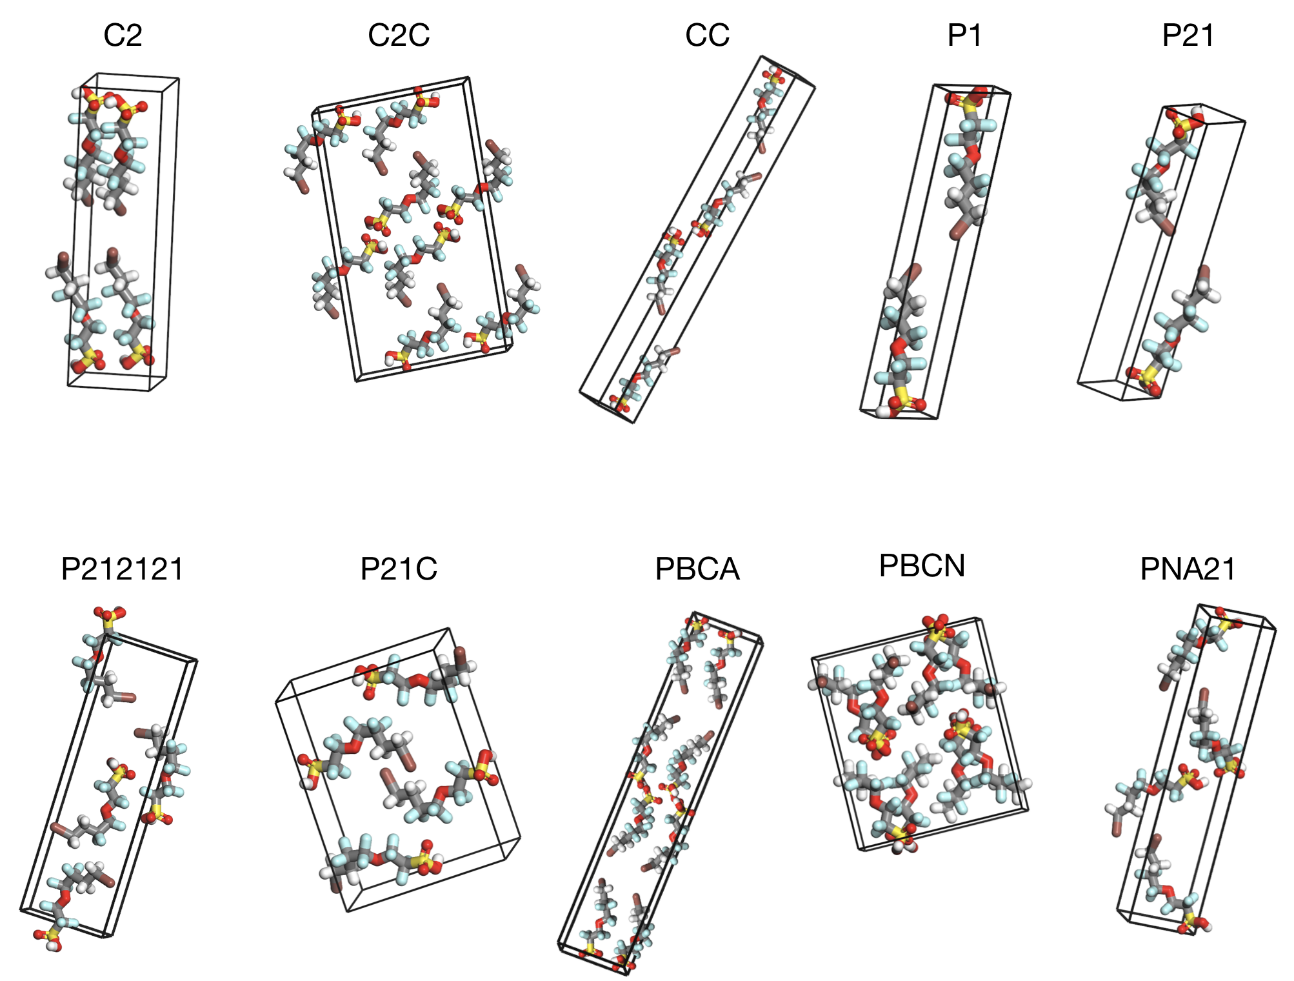


**Figure S1.** Possible symmetries of unit cell of ICH2CH2CF2CF2OCF2CF2SO3H used in simulation.


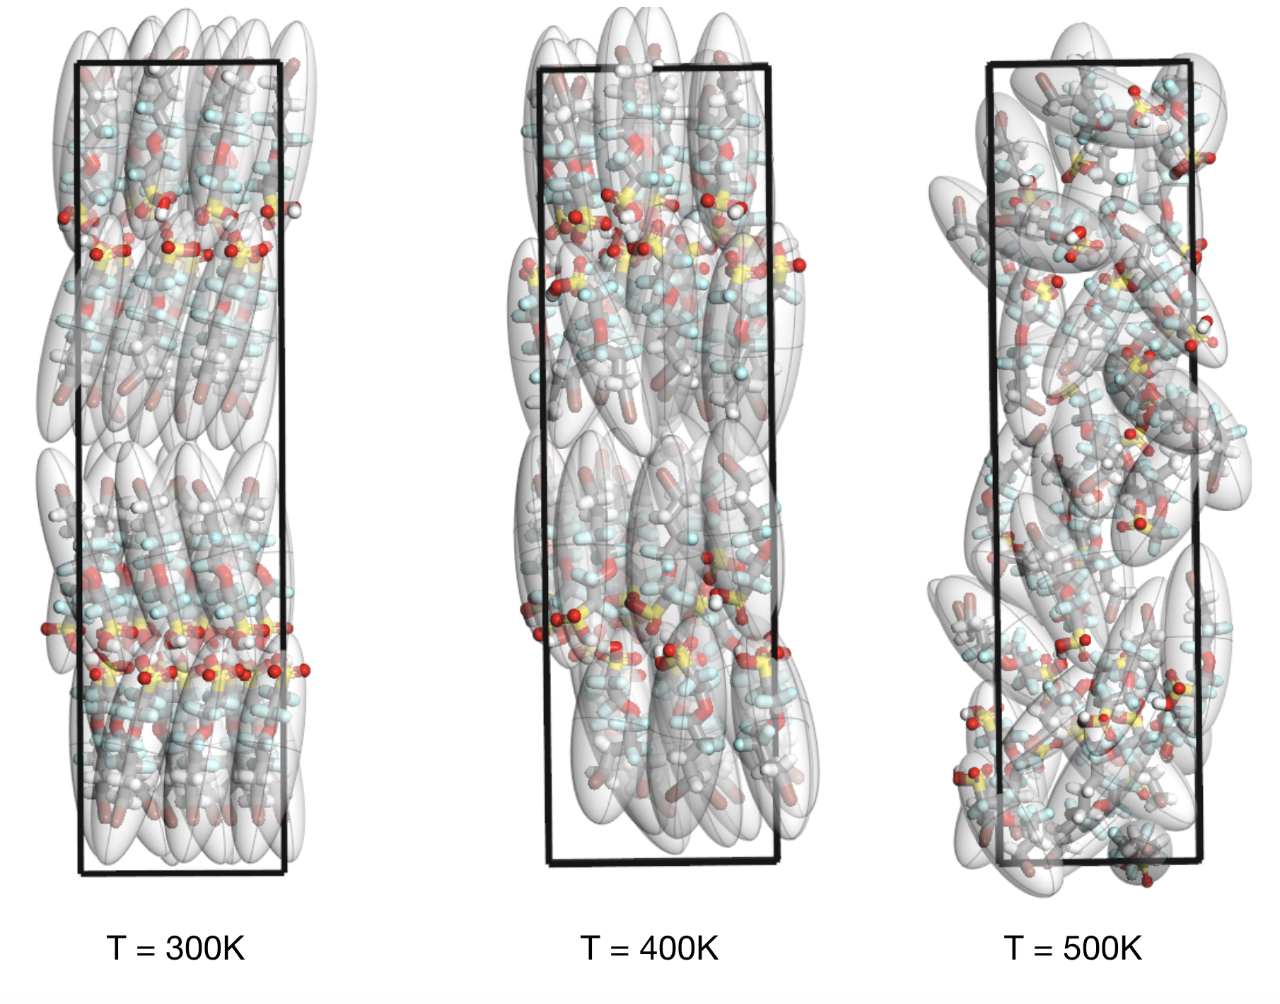


**Figure S2.** Model of P1 unit cell of ICH2CH2CF2CF2OCF2CF2SO3H at different temperatures.

**Table S1.** Experimental and theoretical peak positions for ICH2CH2CF2CF2OCF2CF2SO3H at room temperature.

| ***h*** | ***k*** | ***l*** | ***dexp*** | ***dcalc*** |
| --- | --- | --- | --- | --- |
| 1 | 0 | 0 | 27.54 | 27.50 |
| 2 | 0 | 0 | 13.78 | 13.80 |
| 3 | 0 | 0 | 9.17 | 9.18 |
| 0 | 1 | 0 | 5.21 | 5.16 |
| 1 | 1 | 0 | 5.04 | 5.08 |
| 0 | 0 | 1 | 4.96 | 4.97 |
| 1 | 0 | 1 | 4.87 | 4.89 |
| 2 | 0 | -1 | 4.75 | 4.67 |
| 6 | 0 | 0 | 4.57 | 4.59 |
| 3 | 0 | 1 | 4.39 | 4.37 |
| 4 | -1 | 0 | 4.14 | 4.13 |
| 4 | 0 | 1 | 3.99 | 4.03 |
| 2 | 1 | 1 | 3.72 | 3.74 |
| 5 | 0 | 1 | 3.65 | 3.69 |
| 8 | 0 | 0 | 3.47 | 3.44 |
| 2 | 1 | -1 | 3.21 | 3.24 |
| 4 | 1 | 1 | 3.39 | 3.38 |
| 1 | -1 | 1 | 3.31 | 3.34 |
| 2 | -1 | 1 | 3.21 | 3.24 |
| 3 | -1 | 1 | 3.12 | 3.14 |
| 7 | 0 | 1 | 3.05 | 3.08 |
| 6 | 1 | 1 | 2.93 | 2.97 |
| 6 | 1 | -1 | 2.67 | 2.70 |
| 1 | 2 | 0 | 2.56 | 2.57 |
| 2 | 2 | 0 | 2.51 | 2.54 |
| 1 | 1 | 2 | 2.36 | 2.38 |
| 4 | 0 | 2 | 2.32 | 2.34 |
| 5 | 0 | 2 | 2.27 | 2.26 |
| 6 | 0 | 2 | 2.18 | 2.18 |
| 8 | 2 | 0 | 2.06 | 2.07 |
| 8 | 0 | 2 | 2.02 | 2.01 |
| 3 | 2 | 2 | 1.90 | 1.90 |
| 4 | 2 | 2 | 1.86 | 1.86 |
| 5 | 2 | 2 | 1.82 | 1.83 |
| 6 | 2 | 2 | 1.78 | 1.79 |
| 0 | 3 | 0 | 1.72 | 1.72 |
| 0 | 2 | -2 | 1.68 | 1.67 |
| 3 | 2 | -2 | 1.64 | 1.64 |


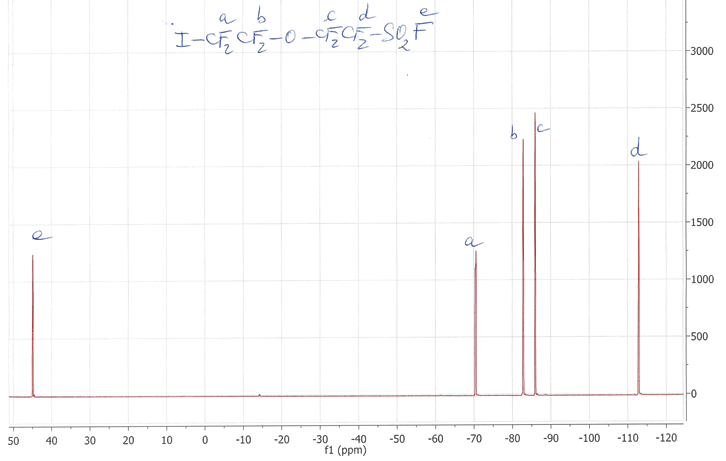


**Figure S3.** 19F-NMR spectrum of ICF2CF2OCF2CF2SO2Frecorded in d6-acetone.


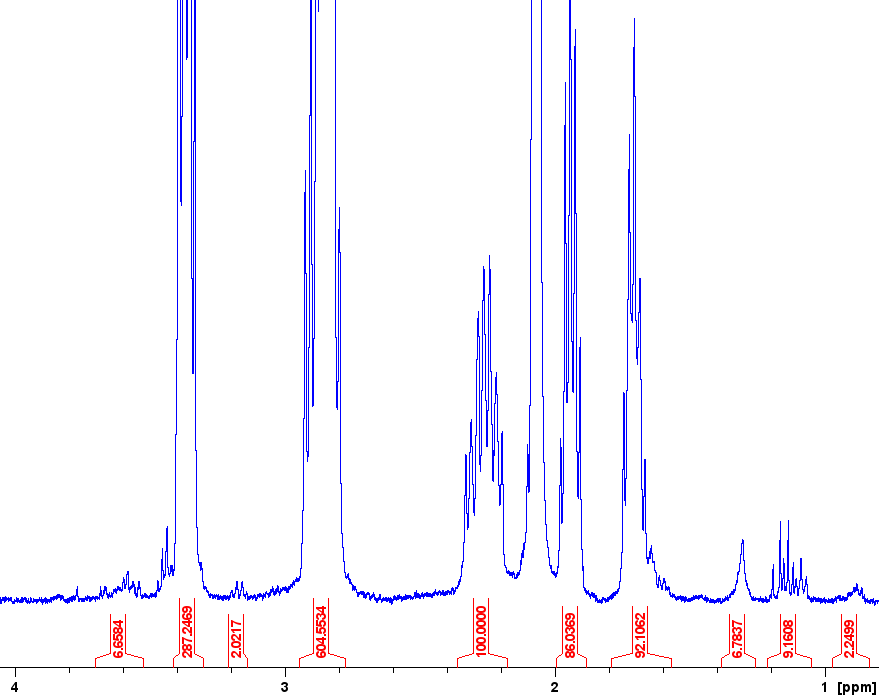


**Figure S4.** 1H-NMR spectrum of ICH2CH2CF2CF2OCF2CF2SO3Hrecorded in d6-acetone.


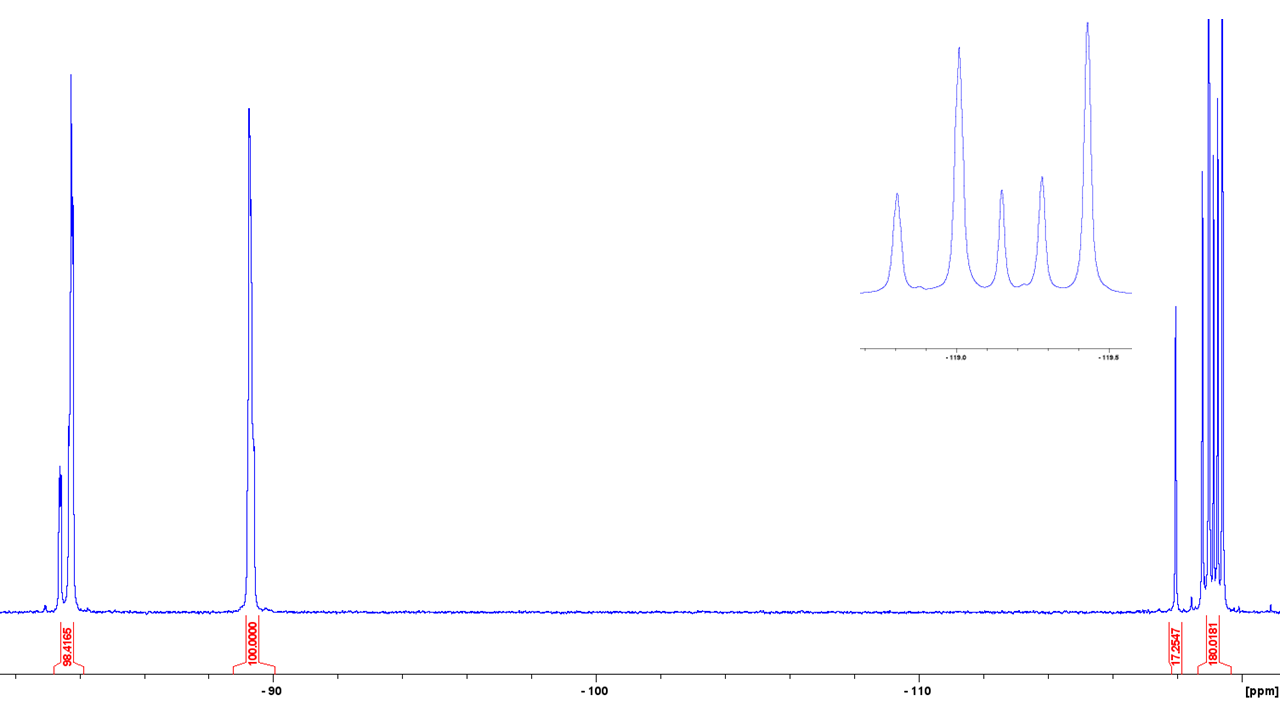


**Figure S5.** 19F-NMR spectrum of ICH2CH2CF2CF2OCF2CF2SO3Hrecorded in d6-acetone.





**Figure S6.** FT-IR spectrum of ICH2CH2CF2CF2OCF2CF2SO3H.
